# Supplementary material for: Short-term effects of air pollution on blood pressure
Source: PubMed Central journal article supplement (PMC6937254; doi:10.1038/s41598-019-56413-y), 2019-12-30
Supplement: 41598_2019_56413_MOESM1_ESM.pdf [file 41598_2019_56413_MOESM1_ESM.pdf]

# Short-term effects of air pollution on blood pressure

**Short title:** Short-term effects of air pollution on BP

**You-Jung Choi, MD<sup>a,b,d</sup>, Sun-Hwa Kim, PhD<sup>a</sup>, Si-Hyuck Kang, MD<sup>a,b</sup>, Sun-Young Kim, PhD<sup>c</sup>, Ok-Jin Kim, PhD<sup>c</sup>, Chang-Hwan Yoon, MD, PhD<sup>a,b</sup>, Hae-Young Lee, MD, PhD<sup>b,d</sup>, Tae-Jin Youn, MD, PhD<sup>a,b</sup>, In-Ho Chae, MD, PhD<sup>a,b</sup>, Cheol-Ho Kim, MD, PhD<sup>a,b</sup>**

<sup>a</sup>Cardiovascular Center, Seoul National University Bundang Hospital, Seongnam-si, Korea;

<sup>b</sup>Department of Internal Medicine, Seoul National University, Seoul, Korea;

<sup>c</sup>Department of Cancer Control and Population Health, Graduate School of Cancer Science and Policy, National Cancer Center, Goyang-si, Gyeonggi-do, Korea;

<sup>d</sup>Cardiovascular Center, Seoul National University Hospital, Seoul, Korea

**Address for correspondence:**

Si-Hyuck Kang, MD

Cardiovascular Center, Internal Medicine, Seoul National University Bundang Hospital

82, Gumi-Ro 173 Beon-Gil, Bundang-Gu, Seongnam-Si, Gyeonggi-Do, Korea, 13620

Telephone: 82-31-787-7027; Fax: 82-31-787-4290; E-mail: eandp303@snu.ac.kr

# Supplementary Material

**Supplementary Figure 1.** Histogram of the hour a day when blood pressure and pulse rate measurements were done

**Supplementary Table 1.** Correlation matrix among air pollutants, temperature, and humidity during the study period

**Supplementary Figure 2.** Relative concentrations of air pollutants according to time in a day during the study period

**Supplementary Figure 3.** Time-lag effects of air pollution on diastolic blood pressure

**Supplementary Figure 4.** Time-lag effects of air pollution on pulse rate

**Supplementary Figure 5.** Subgroup analysis for the associations between air pollutants and systolic blood pressure stratified by body mass index

**Supplementary Figure 1.** Histogram of the hour a day when blood pressure and pulse rate measurements were done

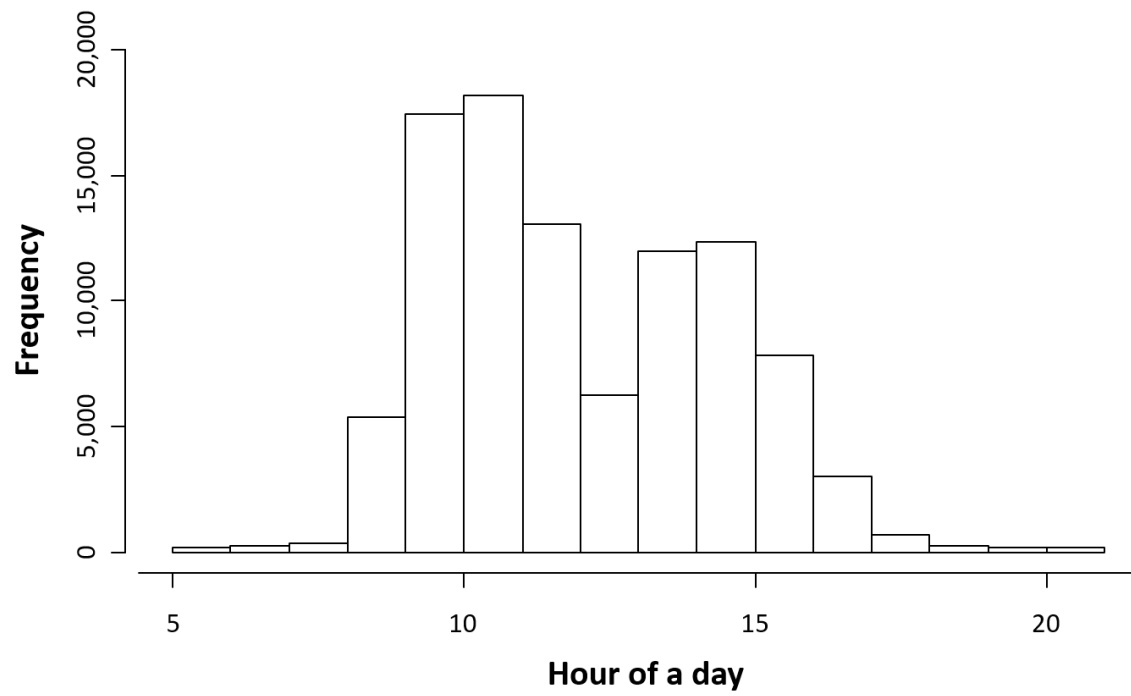

**Supplementary Table 1.** Correlation matrix among air pollutants, temperature, and humidity during the study period

|                         | <b>PM<sub>2.5</sub></b> | <b>PM<sub>10</sub></b> | <b>SO<sub>2</sub></b> | <b>CO</b> | <b>O<sub>3</sub></b> | <b>NO<sub>2</sub></b> | <b>Temperature</b> | <b>Humidity</b> |
|-------------------------|-------------------------|------------------------|-----------------------|-----------|----------------------|-----------------------|--------------------|-----------------|
| <b>PM<sub>2.5</sub></b> | –                       | 0.64                   | 0.40                  | 0.58      | 0.09                 | 0.33                  | -0.05              | 0.07            |
| <b>PM<sub>10</sub></b>  |                         | –                      | 0.34                  | 0.42      | 0.07                 | 0.21                  | -0.16              | -0.10           |
| <b>SO<sub>2</sub></b>   |                         |                        | –                     | 0.49      | 0.05                 | 0.33                  | -0.20              | -0.30           |
| <b>CO</b>               |                         |                        |                       | –         | -0.37                | 0.67                  | -0.37              | 0.17            |
| <b>O<sub>3</sub></b>    |                         |                        |                       |           | –                    | -0.58                 | 0.50               | -0.40           |
| <b>NO<sub>2</sub></b>   |                         |                        |                       |           |                      | –                     | -0.31              | 0.13            |
| <b>Temperature</b>      |                         |                        |                       |           |                      |                       | –                  | 0.03            |
| <b>Humidity</b>         |                         |                        |                       |           |                      |                       |                    | –               |

Abbreviations: PM<sub>2.5</sub>, fine particulate matter with an aerodynamic diameter of <2.5 μm; PM<sub>10</sub>, fine particulate matter with an aerodynamic diameter of <10 μm; CO, carbon monoxide; SO<sub>2</sub>, sulfur dioxide; NO<sub>2</sub>, nitrogen dioxide; O<sub>3</sub>, ozone.

Supplementary Figure 2. Relative concentrations of air pollutants according to time in a day during the study period

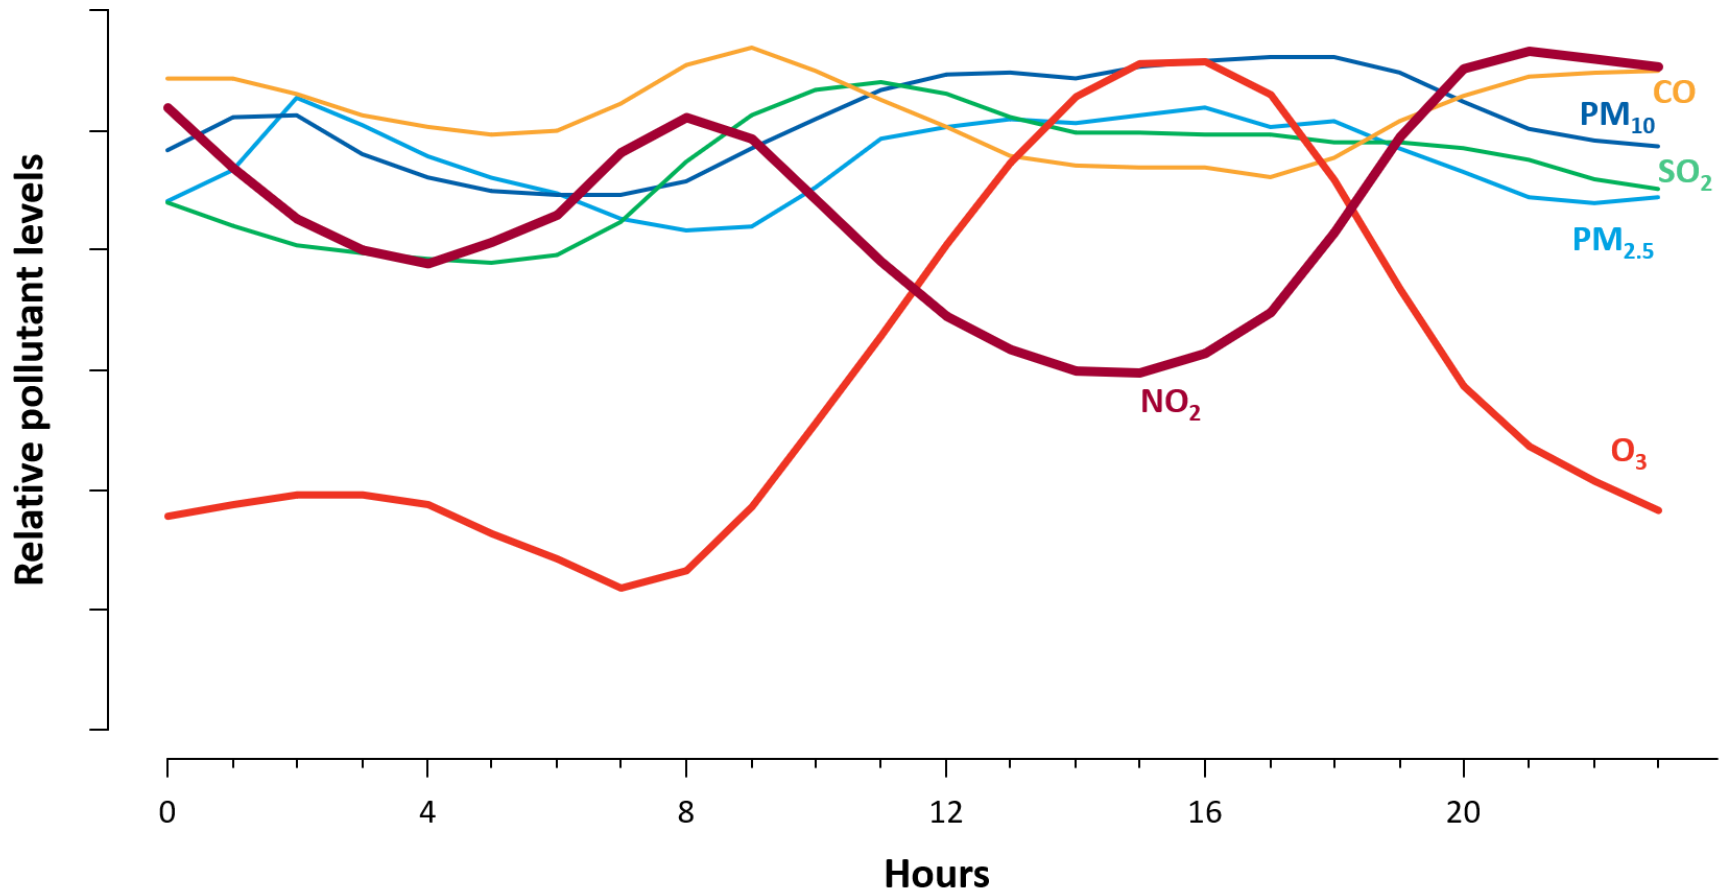

Abbreviations: PM<sub>2.5</sub>, fine particulate matter with an aerodynamic diameter of <2.5 μm; PM<sub>10</sub>, fine particulate matter with an aerodynamic diameter of <10 μm; CO, carbon monoxide; SO<sub>2</sub>, sulfur dioxide; NO<sub>2</sub>, nitrogen dioxide; O<sub>3</sub>, ozone.

**Supplementary Figure 3.** Time-lag effects of air pollution on diastolic blood pressure

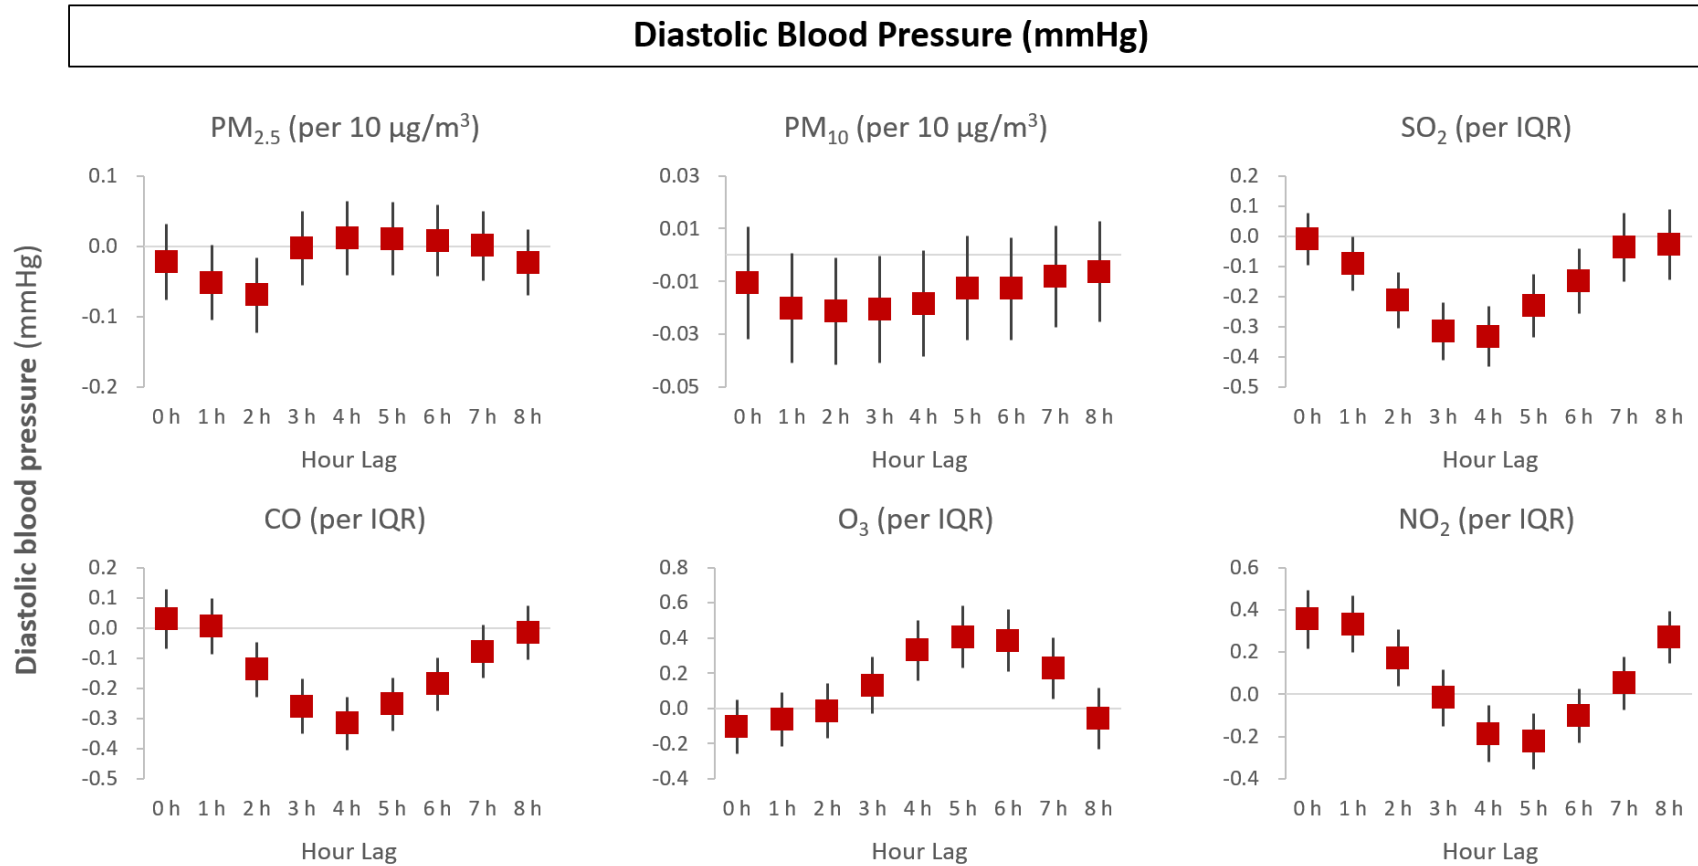

The x-axis represents hour lags, while the y-axis does adjusted effects on systolic blood pressure.

Abbreviations: PM<sub>2.5</sub>, fine particulate matter with an aerodynamic diameter of <2.5 µm; PM<sub>10</sub>, fine particulate matter with an aerodynamic diameter of <10 µm; CO, carbon monoxide; SO<sub>2</sub>, sulfur dioxide; NO<sub>2</sub>, nitrogen dioxide; O<sub>3</sub>, ozone; IQR, Interquartile range.

**Supplementary Figure 4.** Time-lag effects of air pollution on pulse rate

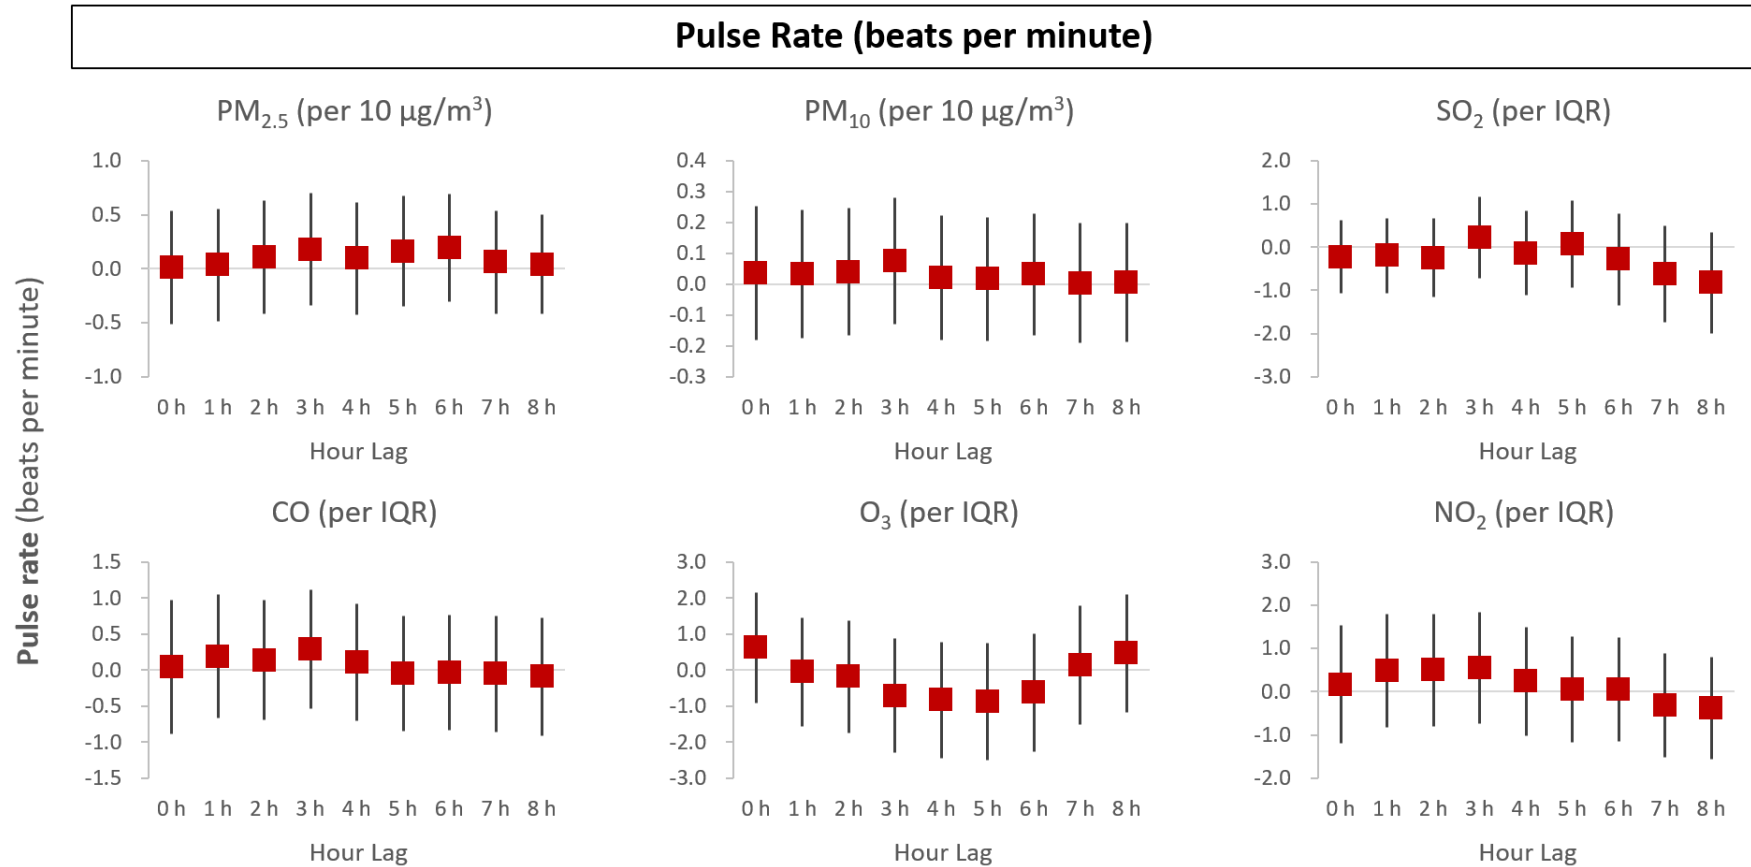

The x-axis represents hour lags, while the y-axis does adjusted effects on systolic blood pressure.

Abbreviations: PM<sub>2.5</sub>, fine particulate matter with an aerodynamic diameter of <2.5 µm; PM<sub>10</sub>, fine particulate matter with an aerodynamic diameter of <10 µm; CO, carbon monoxide; SO<sub>2</sub>, sulfur dioxide; NO<sub>2</sub>, nitrogen dioxide; O<sub>3</sub>, ozone; IQR, Interquartile range.

**Supplementary Figure 5.** Subgroup analysis for the associations between air pollutants and systolic blood pressure stratified by body mass index.

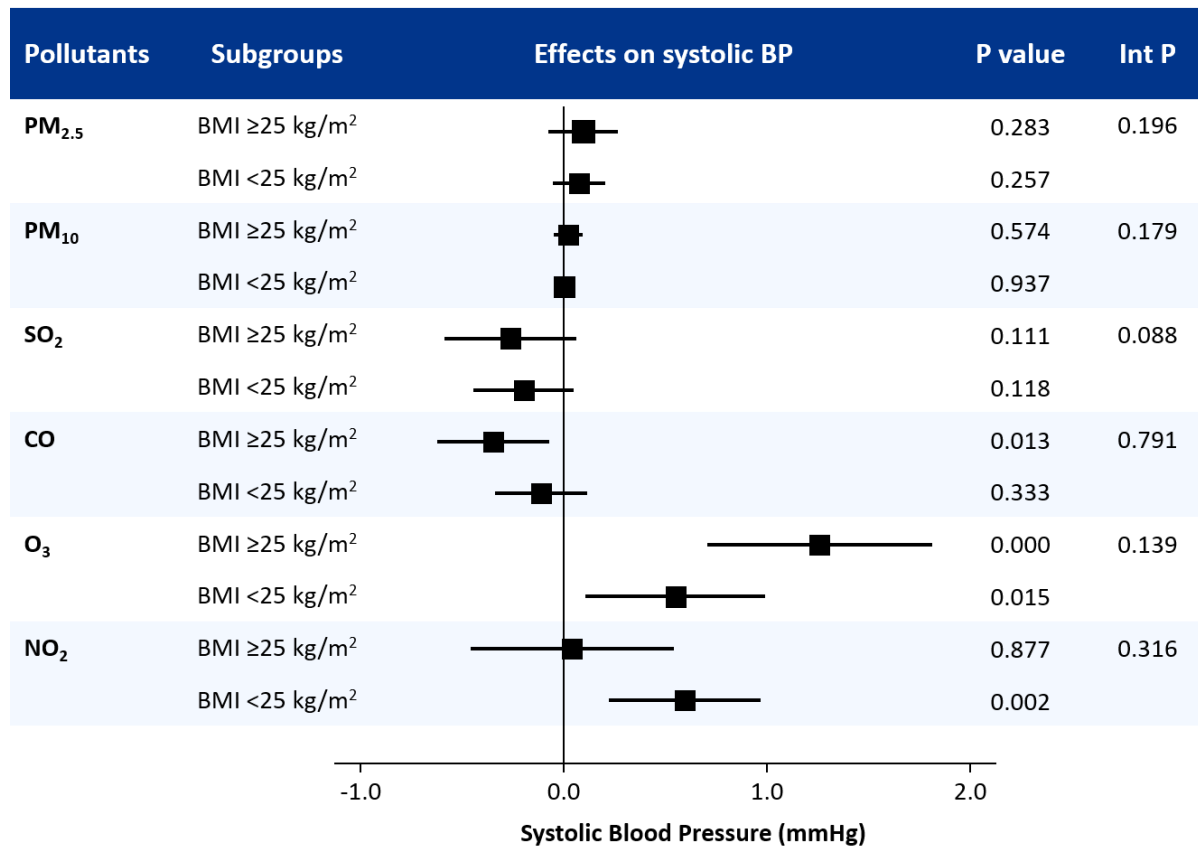

Abbreviations: BMI, body mass index (kg/m<sup>2</sup>); Int P, interaction P values; PM<sub>2.5</sub>, fine particulate matter with an aerodynamic diameter of <2.5 μm; PM<sub>10</sub>; CO, carbon monoxide; SO<sub>2</sub>, sulfur dioxide; NO<sub>2</sub>, nitrogen dioxide; O<sub>3</sub>, ozone.
